# Supplementary material
Source: MDPI journal article supplement (https://www.mdpi.com/2073-4441/16/4/532)
Supplement: s1 [file s1 › water-2771208-supplementary.pdf]

# Supplementary materials

**The Degradation of Sulfamethoxazole via the Fe<sup>2+</sup>/Ultraviolet/Sodium Percarbonate**

**Advanced Oxidation Process: Performance, Mechanism, and Back-Propagate–**

**Artificial Neural Network Prediction Model**

Juxiang Chen<sup>a</sup>, Chong Ruan<sup>a</sup>, Wanying Xie<sup>a,\*</sup>, Caiqiong Dai<sup>a</sup>, Yuqiong Gao<sup>b</sup>, Zhenliang

Liao<sup>c</sup>, Naiyun Gao<sup>c</sup>

a, College of Civil Engineering and Architecture, Xinjiang University, Urumqi, Xinjiang, 830017, China;

b, School of Environment and Architecture, University of Shanghai for Science and Technology, Shanghai, 200093, China

c, State Key Laboratory of Pollution Control and Resources Reuse, College of Environmental Science and Engineering, Tongji University, Shanghai, 200092, China

First author: Juxiang Chen, email: [chenyu1816@126.com](mailto:chenyu1816@126.com);

\*Corresponding author: Wanying Xie, email: [xwy@xju.edu.cn](mailto:xwy@xju.edu.cn);

**Figure lists:**

**Figure S1.** The calibration curve of SMX used in this study.

**Figure S2.** Based on pseudo-first-order kinetic model, the fitting curves of  $\ln(C_t/C_0)$  of SMX (section 3.1.2 in main-text), under the effect of  $\text{Fe}^{2+}$  dosage (a), SPC concentration (b), solution pH (c).

**Figure S3.** Based on the pseudo-first-order kinetic model, the fitting curves of the  $\ln(C_t/C_0)$  of SMX (section 3.1.3 in main-text), at the pH of 4 (a), 6 (b), and 8 (c).

**Figure S4.** Based on the chemical reaction kinetics, the  $\ln(C_t/C_0)$  of SMX or PhOH (section 3.1.3 in main-text), at the pH of 4 (a), 6 (b), and 8 (c).

**Figure S5.** Based on the chemical reaction kinetics, the  $\ln(C_t/C_0)$  of SMX or NB (section 3.1.3 in main-text), at the pH of 4 (a), 6 (b), and 8 (c).

**Figure S6.** During experiments of negative effect of inorganic anions on SMX degradation by  $\text{Fe}^{2+}$ /UV/SPC process (section 3.1.4 in main-text), the fitting curves based on pseudo-first-order kinetic model under the effect of  $\text{Cl}^-$  dosage (a);  $\text{HCO}_3^-$  dosage (b);  $\text{CO}_3^{2-}$  dosage (c);  $\text{SO}_4^{2-}$  dosage (d).

**Table lists:**

**Table S1** The supplier information of chemicals used in this study.

**Table S2** During experiments of influence factors, the fitting equations and  $K_{\text{obs}}$  values of SMX degradation by  $\text{Fe}^{2+}$ /UV/SPC process.

**Table S3** During experiments of identifying major free radicals, the fitting equations and  $K_{\text{obs}}$  values of SMX degradation by  $\text{Fe}^{2+}$ /UV/SPC process.

**Table S4** During experiments of inorganic anions, the fitting equations and  $K_{\text{obs}}$  values of SMX degradation by  $\text{Fe}^{2+}$ /UV/SPC process.

**Table S5** During RSM experiments, the experimental design matrix and the corresponding response values.

**Figure S1.** The calibration curve of SMX used in this study.

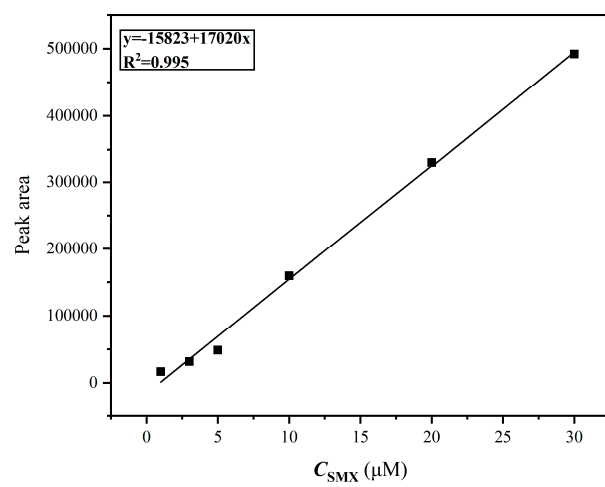

**Figure S2.** Based on pseudo-first-order kinetic model, the fitting curves of  $\ln(C_t/C_0)$  of SMX (section 3.1.2 in main-text), under the effect of  $\text{Fe}^{2+}$  dosage (a), SPC concentration (b), solution pH (c).

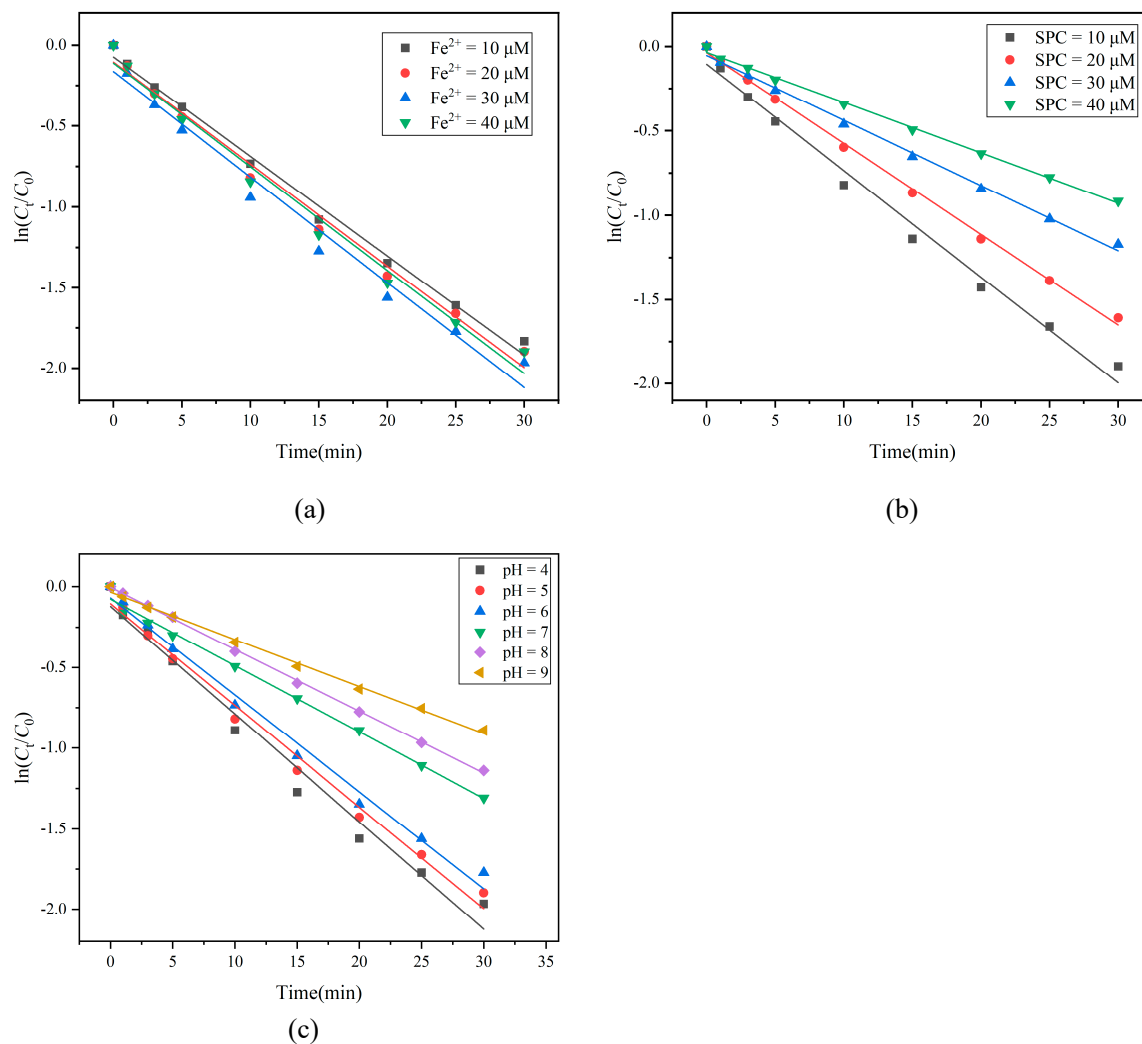

**Figure S3.** Based on the pseudo-first-order kinetic model, the fitting curves of the  $\ln(C_t/C_0)$  of SMX (section 3.1.3 in main-text), at the pH of 4 (a), 6 (b), and 8 (c).

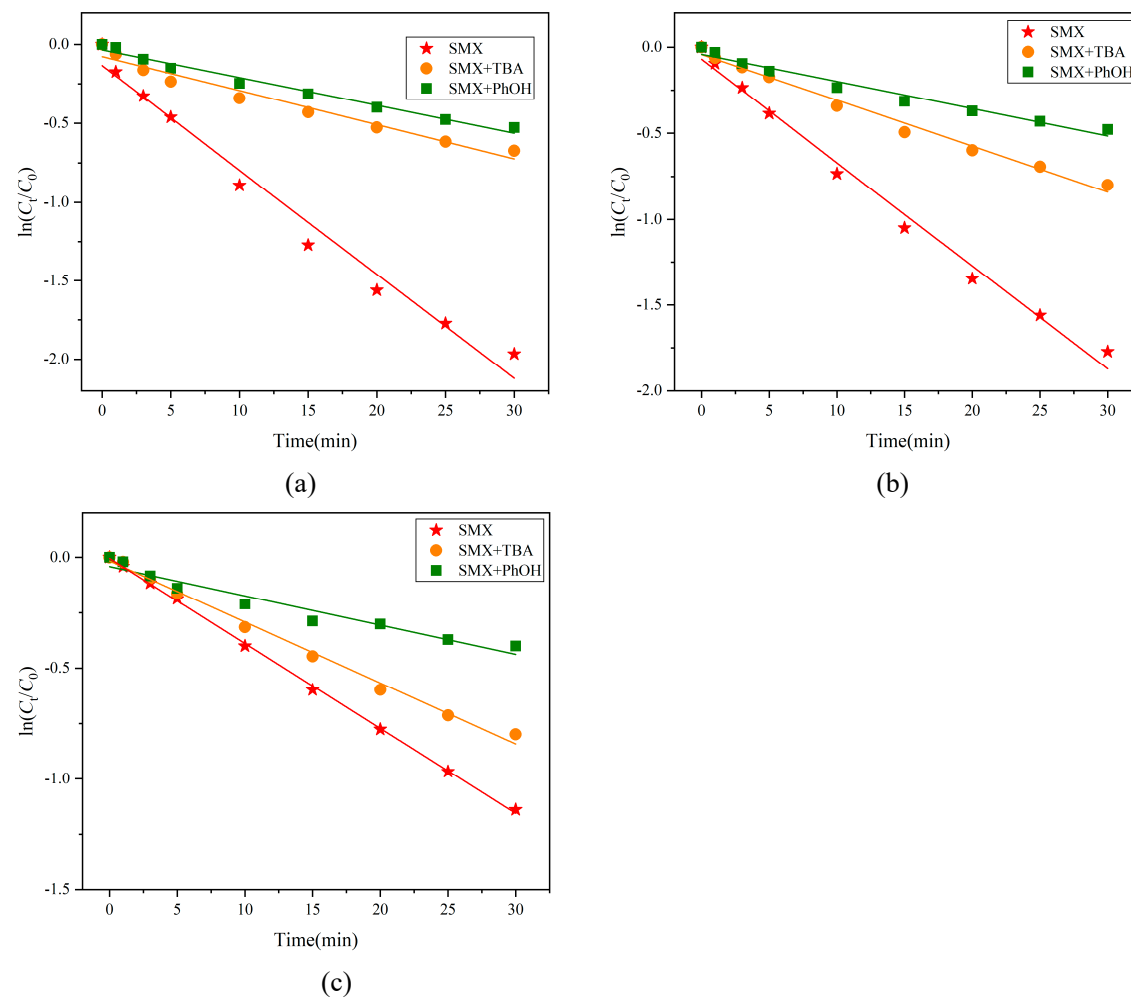

**Figure S4.** Based on the chemical reaction kinetics, the  $\ln(C_t/C_0)$  of SMX or PhOH (section 3.1.3 in main-text), at the pH of 4 (a), 6 (b), and 8 (c).

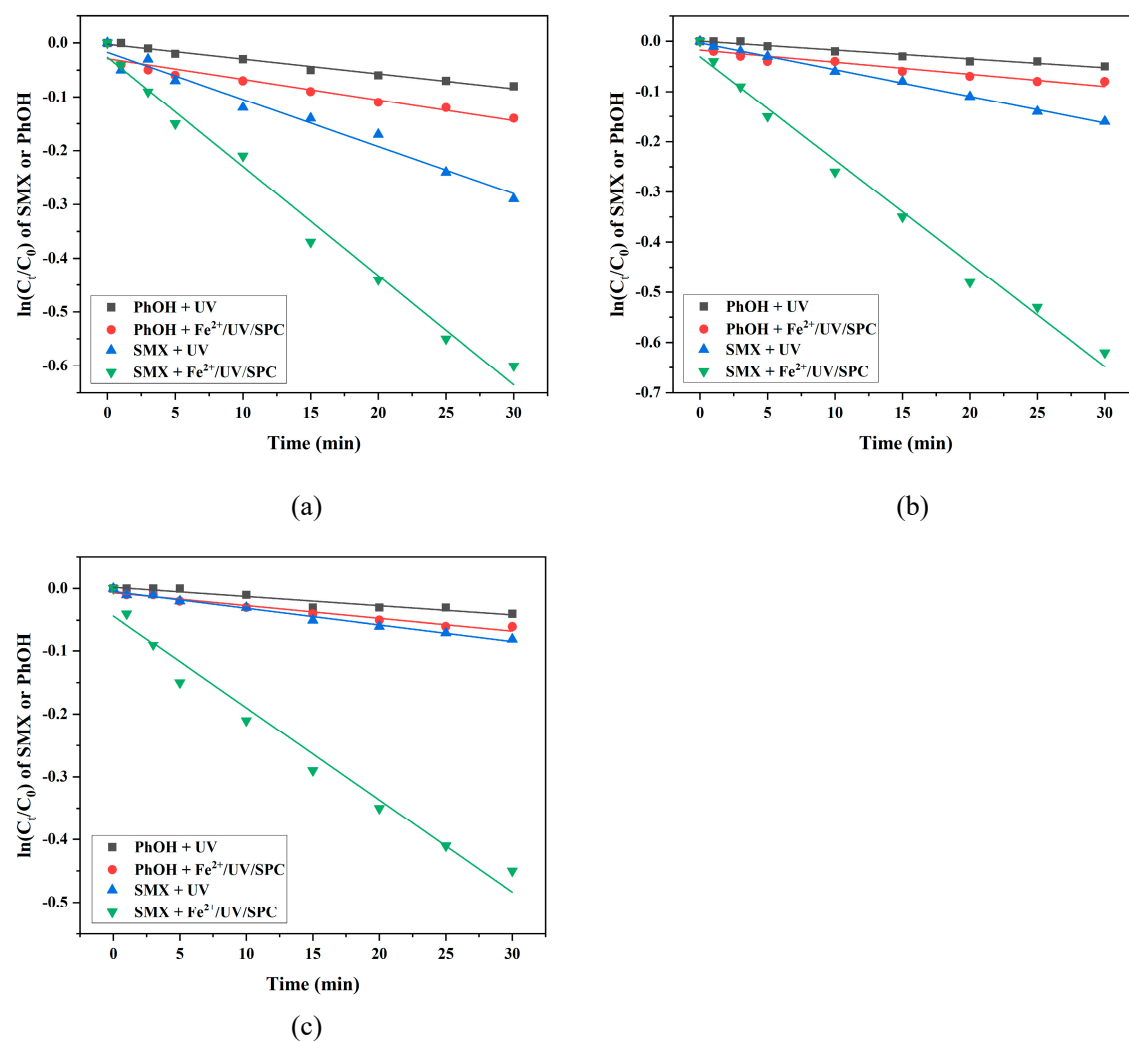

**Figure S5.** Based on the chemical reaction kinetics, the  $\ln(C_t/C_0)$  of SMX or NB (section 3.1.3 in main-text), at the pH of 4 (a), 6 (b), and 8 (c).

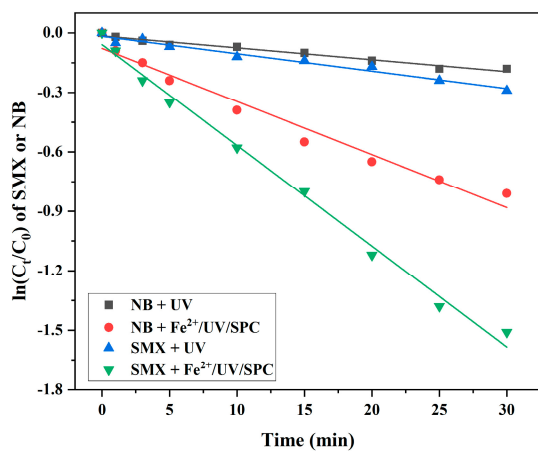

(a)

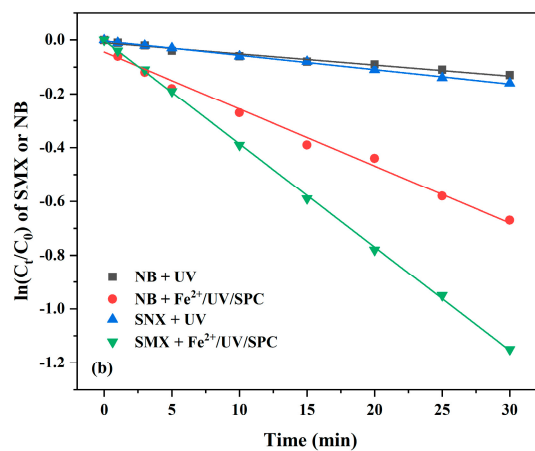

(b)

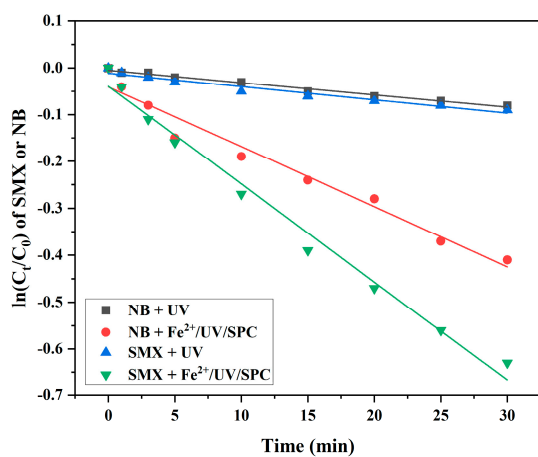

(c)

**Figure S6.** During experiments of negative effect of inorganic anions on SMX degradation by  $\text{Fe}^{2+}/\text{UV}/\text{SPC}$  process (section 3.1.4 in main-text), the fitting curves based on pseudo-first-order kinetic model under the effect of  $\text{Cl}^-$  dosage (a);  $\text{HCO}_3^-$  dosage (b);  $\text{CO}_3^{2-}$  dosage (c);  $\text{SO}_4^{2-}$  dosage (d).

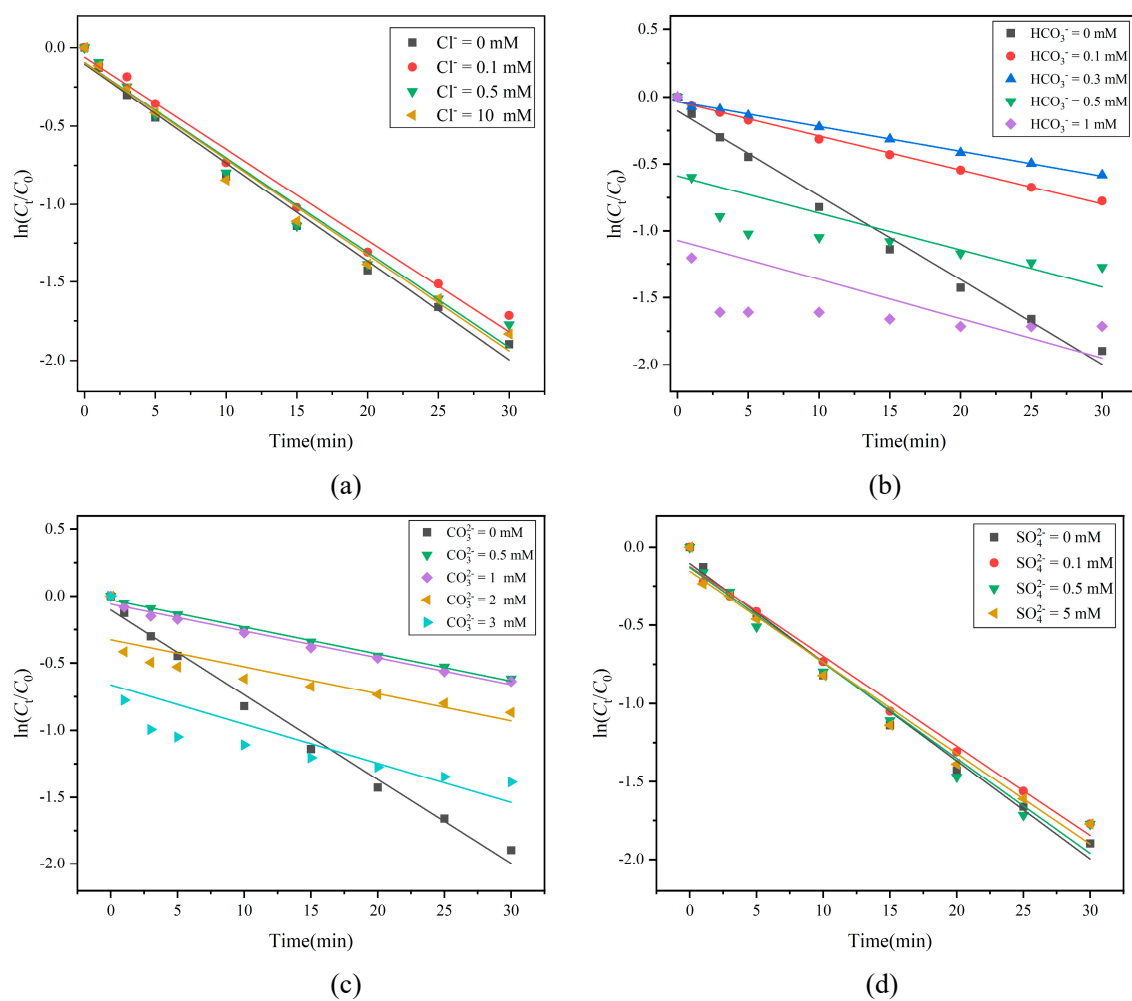

**Table S1.** The supplier information of chemicals used in this study.

| Chemicals                                                    | Supplier                                                 |
|--------------------------------------------------------------|----------------------------------------------------------|
| Sulfamethoxazole, SMX                                        | Shanghai Aladdin Biochemical Technology Co., Ltd., China |
| $\text{FeSO}_4 \cdot 7\text{H}_2\text{O}$                    | Shanghai Macklin Biochemical Technology Co., Ltd., China |
| $\text{Na}_2\text{CO}_3 \cdot 1.5\text{H}_2\text{O}_2$ , SPC | Shanghai Aladdin Biochemical Technology Co., Ltd., China |
| NaOH                                                         | Guangfu Technology Development Co. Ltd., China           |
| HCl                                                          | Sigma-Aldrich (Shanghai) Trading Co. Ltd., China         |
| $\text{Na}_2\text{CO}_3$                                     | Guangfu Technology Development Co. Ltd., China           |
| $\text{NaHCO}_3$                                             | Guangfu Technology Development Co. Ltd., China           |
| $\text{Na}_2\text{SO}_4$                                     | Sinopharm Chemical Reagent Co. Ltd., China               |
| $(\text{CH}_3)_3\text{COH}$ , TBA                            | Sinopharm Chemical Reagent Co. Ltd., China               |
| $\text{C}_6\text{H}_6\text{O}$ , PhOH                        | Shanghai Aladdin Biochemical Technology Co. Ltd., China  |
| $\text{C}_6\text{H}_5\text{NO}_2$ , NB                       | Shanghai Macklin Biochemical Technology Co. Ltd., China  |
| KI                                                           | Shanghai Aladdin Biochemical Technology Co. Ltd., China  |
| $\text{KIO}_3$                                               | Shanghai Macklin Biochemical Technology Co. Ltd., China  |
| $\text{Na}_2\text{S}_2\text{O}_3$                            | Zigaoxin Chemical Co. Ltd., China                        |
| NaCl                                                         | Zigaoxin Chemical Co. Ltd., China                        |
| $\text{CH}_3\text{OH}$                                       | Sigma-Aldrich (Shanghai) Trading Co. Ltd., China         |
| $\text{CH}_3\text{CN}$                                       | Sigma-Aldrich (Shanghai) Trading Co. Ltd., China         |
| $\text{Na}_2\text{B}_4\text{O}_7 \cdot 5\text{H}_2\text{O}$  | Zigaoxin Chemical Co. Ltd., China                        |

**Table S2.** During experiments of influence factors, the fitting equations and  $K_{obs}$  values of SMX degradation by  $Fe^{2+}$ /UV/SPC process.

| Figure name     | Experimental Condition     | Fitting equation          | $K_{obs}$<br>( $\times 10^{-2} \text{ min}^{-1}$ ) | $R^2$  |
|-----------------|----------------------------|---------------------------|----------------------------------------------------|--------|
| <b>Fig. S2a</b> | $Fe^{2+}=10 \mu\text{m/L}$ | $Y = -0.06146X - 0.07403$ | 6.146                                              | 0.9935 |
|                 | $Fe^{2+}=20 \mu\text{m/L}$ | $Y = -0.06304X - 0.10553$ | 6.304                                              | 0.9890 |
|                 | $Fe^{2+}=30 \mu\text{m/L}$ | $Y = -0.06523X - 0.16401$ | 6.523                                              | 0.9769 |
|                 | $Fe^{2+}=40 \mu\text{m/L}$ | $Y = -0.06403X - 0.112$   | 6.403                                              | 0.9855 |
| <b>Fig. S2b</b> | SPC=10 mg/L                | $Y = -0.06304X - 0.10553$ | 6.304                                              | 0.9890 |
|                 | SPC=20 mg/L                | $Y = -0.05381X - 0.03688$ | 5.381                                              | 0.9982 |
|                 | SPC=30 mg/L                | $Y = -0.03855X - 0.05344$ | 3.855                                              | 0.9958 |
|                 | SPC=40 mg/L                | $Y = -0.02978X - 0.0353$  | 2.978                                              | 0.9977 |
| <b>Fig. S2c</b> | pH=4                       | $Y = -0.06674X - 0.1222$  | 6.674                                              | 0.9803 |
|                 | pH=5                       | $Y = -0.06304X - 0.10553$ | 6.304                                              | 0.9890 |
|                 | pH=6                       | $Y = -0.0601X - 0.06986$  | 6.010                                              | 0.9907 |
|                 | pH=7                       | $Y = -0.04117X - 0.07736$ | 4.117                                              | 0.9946 |
|                 | pH=8                       | $Y = -0.03837X - 0.00482$ | 3.837                                              | 0.9994 |
|                 | pH=9                       | $Y = -0.02924X - 0.03408$ | 2.924                                              | 0.9967 |

**Table S3.** During experiments of identifying major free radicals, the fitting equations and $K_{\text{obs}}$  values of SMX degradation by  $\text{Fe}^{2+}$ /UV/SPC process.

| Figure name | Experimental Condition      | Fitting equation          | $K_{\text{obs}}$<br>( $\times 10^{-2} \text{ min}^{-1}$ ) | $R^2$  |
|-------------|-----------------------------|---------------------------|-----------------------------------------------------------|--------|
| Fig. S3a    | SMX                         | $Y = -0.06623X - 0.13439$ | 6.623                                                     | 0.9806 |
|             | SMX + TBA<br>(TBA=2 mM/L)   | $Y = -0.02158X - 0.07754$ | 2.158                                                     | 0.9643 |
|             | SMX + PhOH<br>(PhOH=2 mM/L) | $Y = -0.01761X - 0.03507$ | 1.761                                                     | 0.9798 |
| Fig. S3b    | SMX                         | $Y = -0.0601X - 0.06986$  | 6.010                                                     | 0.9907 |
|             | SMX + TBA<br>(TBA=2 mM/L)   | $Y = -0.02658X - 0.04238$ | 2.658                                                     | 0.9879 |
|             | SMX + PhOH<br>(PhOH=2 mM/L) | $Y = -0.01581X - 0.04123$ | 1.581                                                     | 0.9715 |
| Fig. S3c    | SMX                         | $Y = -0.03837X - 0.00482$ | 3.837                                                     | 0.9994 |
|             | SMX + TBA<br>(TBA=2 mM/L)   | $Y = -0.02755X - 0.01611$ | 2.755                                                     | 0.9936 |
|             | SMX + PhOH<br>(PhOH=2 mM/L) | $Y = -0.0132X - 0.04171$  | 1.320                                                     | 0.9490 |

**Table S4.** During experiments of inorganic anions, the fitting equations and  $K_{\text{obs}}$  values of SMX degradation by  $\text{Fe}^{2+}$ /UV/SPC process.

| Figure name     | Experimental Condition              | Fitting equation          | $K_{\text{obs}}$<br>( $\times 10^{-2} \text{ min}^{-1}$ ) | $R^2$  |
|-----------------|-------------------------------------|---------------------------|-----------------------------------------------------------|--------|
| <b>Fig. S6a</b> | $\text{Cl}^- = 0 \text{ mM}$        | $Y = -0.06304X - 0.10553$ | 6.304                                                     | 0.9890 |
|                 | $\text{Cl}^- = 0.1 \text{ mM}$      | $Y = -0.05857X - 0.06196$ | 5.857                                                     | 0.9888 |
|                 | $\text{Cl}^- = 0.5 \text{ mM}$      | $Y = -0.06074X - 0.09536$ | 6.074                                                     | 0.9811 |
|                 | $\text{Cl}^- = 10 \text{ mM}$       | $Y = -0.06141X - 0.09786$ | 6.141                                                     | 0.9856 |
| <b>Fig. S6b</b> | $\text{HCO}_3^- = 0 \text{ mM}$     | $Y = -0.06304X - 0.10553$ | 6.304                                                     | 0.9890 |
|                 | $\text{HCO}_3^- = 0.1 \text{ mM}$   | $Y = -0.02535X - 0.03666$ | 2.535                                                     | 0.9957 |
|                 | $\text{HCO}_3^- = 0.3 \text{ mM}$   | $Y = -0.01845X - 0.03583$ | 1.845                                                     | 0.9940 |
|                 | $\text{HCO}_3^- = 0.5 \text{ mM}$   | $Y = -0.02781X - 0.58781$ | 2.781                                                     | 0.5777 |
|                 | $\text{HCO}_3^- = 1 \text{ mM}$     | $Y = -0.02925X - 1.07217$ | 2.925                                                     | 0.3316 |
| <b>Fig. S6c</b> | $\text{CO}_3^{2-} = 0 \text{ mM}$   | $Y = -0.06304X - 0.10553$ | 6.304                                                     | 0.9890 |
|                 | $\text{CO}_3^{2-} = 0.5 \text{ mM}$ | $Y = -0.0201X - 0.03062$  | 2.010                                                     | 0.9951 |
|                 | $\text{CO}_3^{2-} = 1 \text{ mM}$   | $Y = -0.01994X - 0.06156$ | 1.994                                                     | 0.9839 |
|                 | $\text{CO}_3^{2-} = 2 \text{ mM}$   | $Y = -0.02008X - 0.3265$  | 2.008                                                     | 0.7247 |
|                 | $\text{CO}_3^{2-} = 3 \text{ mM}$   | $Y = -0.02921X - 0.66168$ | 2.921                                                     | 0.5688 |
| <b>Fig. S6d</b> | $\text{SO}_4^{2-} = 0 \text{ mM}$   | $Y = -0.06304X - 0.10553$ | 6.304                                                     | 0.9890 |
|                 | $\text{SO}_4^{2-} = 0.1 \text{ mM}$ | $Y = -0.05734X - 0.12548$ | 5.734                                                     | 0.9907 |
|                 | $\text{SO}_4^{2-} = 0.5 \text{ mM}$ | $Y = -0.06099X - 0.1307$  | 6.099                                                     | 0.9769 |
|                 | $\text{SO}_4^{2-} = 5 \text{ mM}$   | $Y = -0.05821X - 0.15509$ | 5.821                                                     | 0.9803 |

**Table S5.** During RSM experiments, the experimental design matrix and the corresponding response values.

| Experimental<br>number | Range and levels |                |                |                | Code value                            |                                                   |                        |                       | Experiment<br>al values | Response<br>values |
|------------------------|------------------|----------------|----------------|----------------|---------------------------------------|---------------------------------------------------|------------------------|-----------------------|-------------------------|--------------------|
|                        | Z <sub>1</sub>   | Z <sub>2</sub> | Z <sub>3</sub> | Z <sub>4</sub> | x <sub>1</sub><br>(C <sub>S</sub> PC) | x <sub>2</sub><br>(C <sub>Fe<sup>2+</sup></sub> ) | x <sub>3</sub><br>(pH) | x <sub>4</sub><br>(t) | y*<br>(%)               | y<br>(%)           |
| 1                      | 0                | -1             | 0              | 1              | 30                                    | 10                                                | 6                      | 30                    | 60.4                    | 61.2               |
| 2                      | -1               | 0              | 1              | 0              | 20                                    | 20                                                | 8                      | 20                    | 65.4                    | 69.0               |
| 3                      | 0                | 1              | 0              | 1              | 30                                    | 30                                                | 6                      | 30                    | 74.5                    | 74.7               |
| 4                      | 0                | 0              | -1             | 1              | 30                                    | 20                                                | 4                      | 30                    | 89.4                    | 90.6               |
| 5                      | 1                | 0              | -1             | 0              | 40                                    | 20                                                | 4                      | 20                    | 86.1                    | 84.1               |
| 6                      | -1               | 0              | 0              | 1              | 20                                    | 20                                                | 6                      | 30                    | 80.6                    | 77.8               |
| 7                      | 0                | 1              | 1              | 0              | 30                                    | 30                                                | 8                      | 20                    | 62.8                    | 65.6               |
| 8                      | 0                | 0              | 1              | -1             | 30                                    | 20                                                | 8                      | 10                    | 35.1                    | 31.8               |
| 9                      | 0                | 0              | 0              | 0              | 30                                    | 20                                                | 6                      | 20                    | 65.0                    | 65.2               |
| 10                     | 1                | 0              | 1              | 0              | 40                                    | 20                                                | 8                      | 20                    | 47.2                    | 44.3               |
| 11                     | -1               | 1              | 0              | 0              | 20                                    | 30                                                | 6                      | 20                    | 82.1                    | 76.8               |
| 12                     | 0                | 0              | 0              | 0              | 30                                    | 20                                                | 6                      | 20                    | 63.0                    | 65.2               |
| 13                     | 0                | -1             | -1             | 0              | 30                                    | 10                                                | 4                      | 20                    | 84.4                    | 82.1               |
| 14                     | 0                | -1             | 0              | -1             | 30                                    | 10                                                | 6                      | 10                    | 30.9                    | 32.4               |
| 15                     | 0                | -1             | 1              | 0              | 30                                    | 10                                                | 8                      | 20                    | 46.2                    | 44.6               |
| 16                     | 1                | 0              | 0              | 1              | 40                                    | 20                                                | 6                      | 30                    | 62.3                    | 61.4               |
| 17                     | 0                | 0              | 1              | 1              | 30                                    | 20                                                | 8                      | 30                    | 66.7                    | 68.2               |
| 18                     | 1                | -1             | 0              | 0              | 40                                    | 10                                                | 6                      | 20                    | 45.2                    | 48.4               |
| 19                     | 0                | 1              | 0              | -1             | 30                                    | 30                                                | 6                      | 10                    | 45.1                    | 45.9               |

| Experimental<br>number | Range and levels |                |                |                | Code value                            |                                                   |                        |                       | Experiment<br>al values | Response<br>values |
|------------------------|------------------|----------------|----------------|----------------|---------------------------------------|---------------------------------------------------|------------------------|-----------------------|-------------------------|--------------------|
|                        | Z <sub>1</sub>   | Z <sub>2</sub> | Z <sub>3</sub> | Z <sub>4</sub> | x <sub>1</sub><br>(C <sub>SPC</sub> ) | x <sub>2</sub><br>(C <sub>Fe<sup>2+</sup></sub> ) | x <sub>3</sub><br>(pH) | x <sub>4</sub><br>(t) | y*<br>(%)               | y<br>(%)           |
| 20                     | 0                | 0              | 0              | 0              | 30                                    | 20                                                | 6                      | 20                    | 69.0                    | 65.2               |
| 21                     | -1               | 0              | -1             | 0              | 20                                    | 20                                                | 4                      | 20                    | 84.6                    | 89.2               |
| 22                     | -1               | 0              | 0              | -1             | 20                                    | 20                                                | 6                      | 10                    | 46.1                    | 47.5               |
| 23                     | -1               | -1             | 0              | 0              | 20                                    | 10                                                | 6                      | 20                    | 60.0                    | 58.5               |
| 24                     | 0                | 0              | 0              | 0              | 30                                    | 20                                                | 6                      | 20                    | 65.0                    | 65.2               |
| 25                     | 0                | 0              | 0              | 0              | 30                                    | 20                                                | 6                      | 20                    | 64.0                    | 65.2               |
| 26                     | 1                | 1              | 0              | 0              | 40                                    | 30                                                | 6                      | 20                    | 57.7                    | 57.1               |
| 27                     | 0                | 1              | -1             | 0              | 30                                    | 30                                                | 4                      | 20                    | 86.0                    | 88.1               |
| 28                     | 1                | 0              | 0              | -1             | 40                                    | 20                                                | 6                      | 10                    | 30.8                    | 34.0               |
| 29                     | 0                | 0              | -1             | -1             | 30                                    | 20                                                | 4                      | 10                    | 72.9                    | 69.4               |
